# Supplementary material for: A novel electrochemical sensor for simultaneous determination of 2,4-dichlorophenol and 3-chlorophenol
Source: Royal Society of Chemistry journal article supplement (doi:10.1039/d4en00588k), 2024-01-01
Supplement: d4en00588k1.pdf [file d4en00588k1.pdf]

## Supplementary Material

### **A novel electrochemical sensor for simultaneous determination of 2,4-dichlorophenol and 3-chlorophenol**

Yongqi Feng<sup>1</sup>, Shuting Luan<sup>1</sup>, Jiaxin Yi, Yi Zhang, Xuchun Li, Shiwen Lv, Yanqing  
Cong\*

*School of Environmental Science and Engineering, Zhejiang Gongshang University,  
Hangzhou 310018, China*

---

\* To whom correspondence should be addressed. Email: yqcong@zjgsu.edu.cn.

<sup>1</sup> These authors contribute equally to this article.

## Contents of the Supplementary Information

- Additional Figure S1-S5

**Fig. S1** Scheme for the preparation of CeNiCu-LDH@CC

**Fig. S2** XPS survey spectrum of CeNi-LDH (a), and C 1s (b), Ni 2p (c), Ce 3d (d)

**Fig. S3** (a-d) I-t curves and their calculated 2,4-DCP and 3-CP diffusion coefficients onto the CeNiCu-LDH@CC ; (e-h) I-t curves and their calculated 2,4-DCP and 3-CP diffusion coefficients onto the CeNi-LDH@CC

**Fig. S4** (a) CVs of 2,4-DCP and 3-CP on CeNiCu-LDH@CC with different scan rate (10~200 mV/s); (b) Plots of oxidation peak currents versus  $v^{1/2}$ ; (c) Oxidation peak potential versus  $\ln v$

**Fig. S5** (a) CVs of 10  $\mu\text{M}$  2,4-DCP and 10  $\mu\text{M}$  3-CP on CeNiCu-LDH@CC with different pH; Diagram of pH and oxidation peak (b) current (c) potential

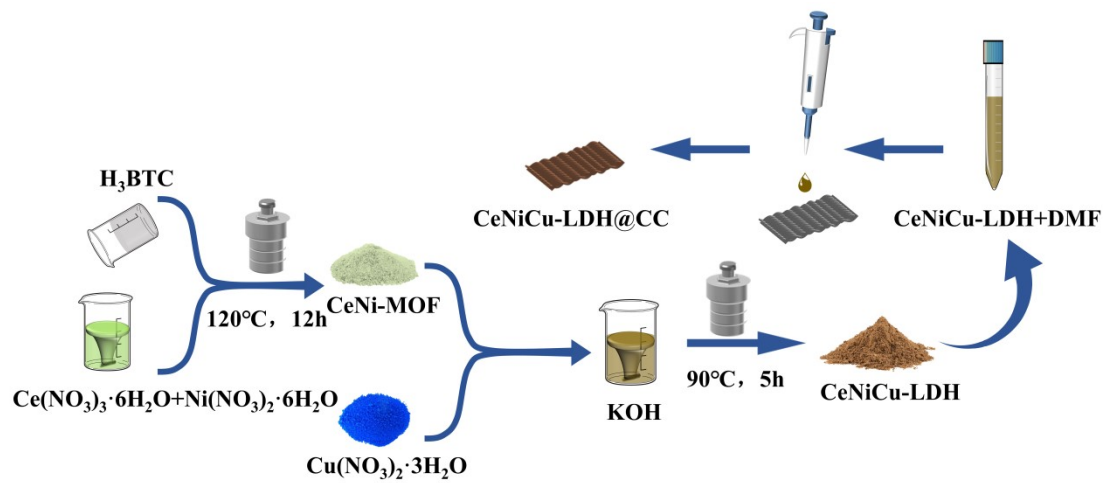

**Fig. S1** Scheme for the preparation of CeNiCu-LDH@CC

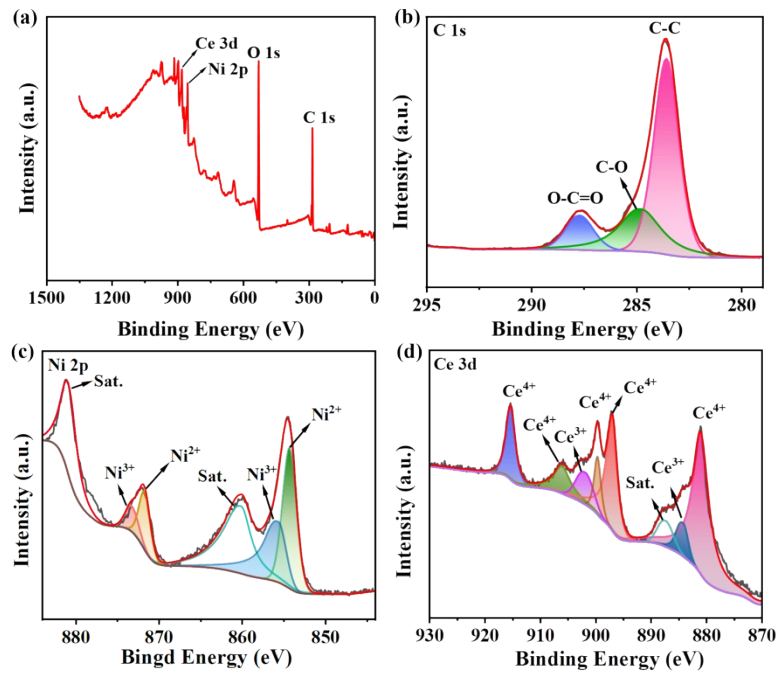

**Fig. S2.** XPS survey spectrum of CeNi-LDH (a), and C 1s (b), Ni 2p (c), Ce 3d (d)

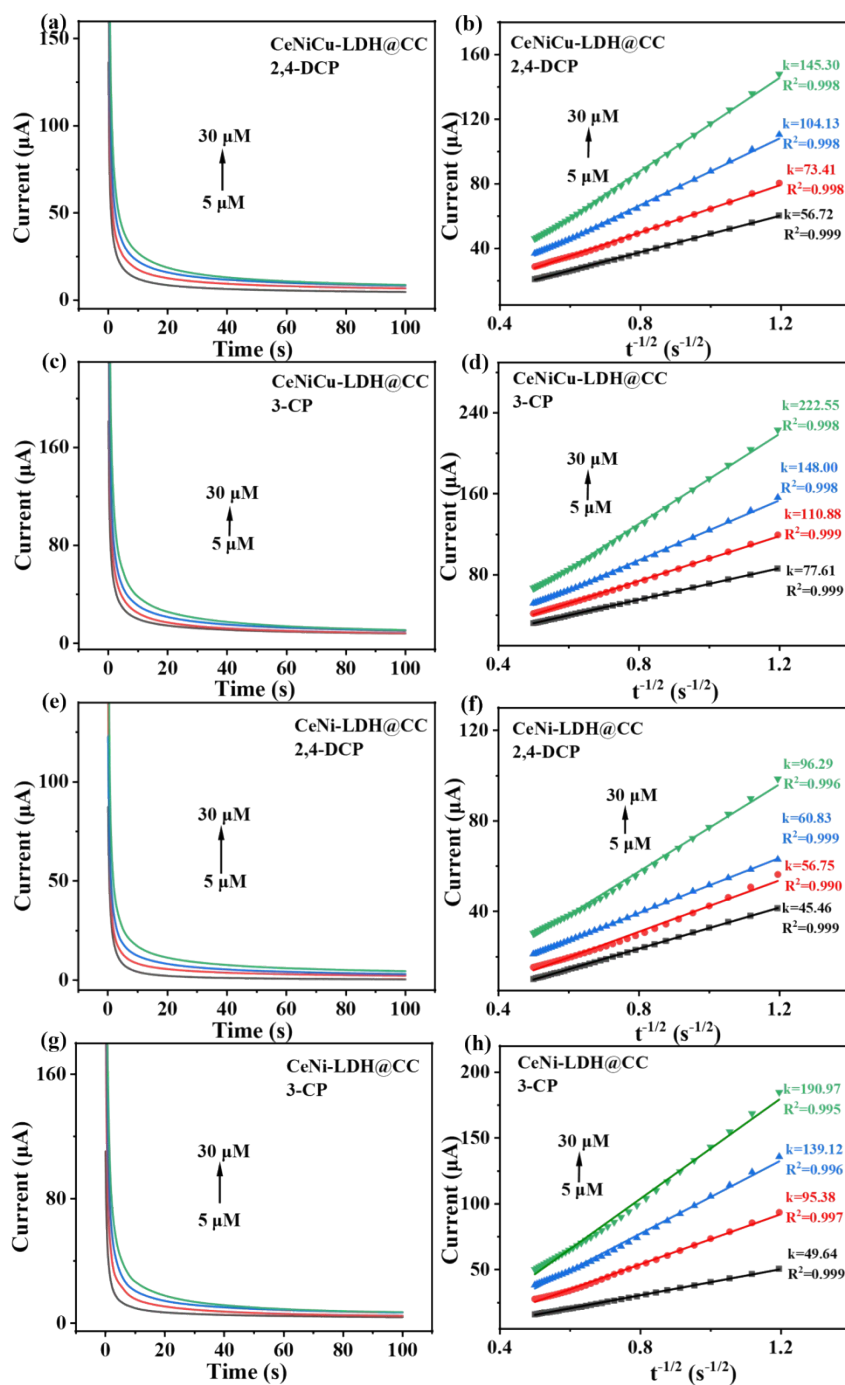

**Fig. S3.** (a-d) I-t curves and their calculated 2,4-DCP and 3-CP diffusion coefficients onto the CeNiCu-LDH@CC ; (e-h) I-t curves and their calculated 2,4-DCP and 3-CP diffusion coefficients onto the CeNi-LDH@CC

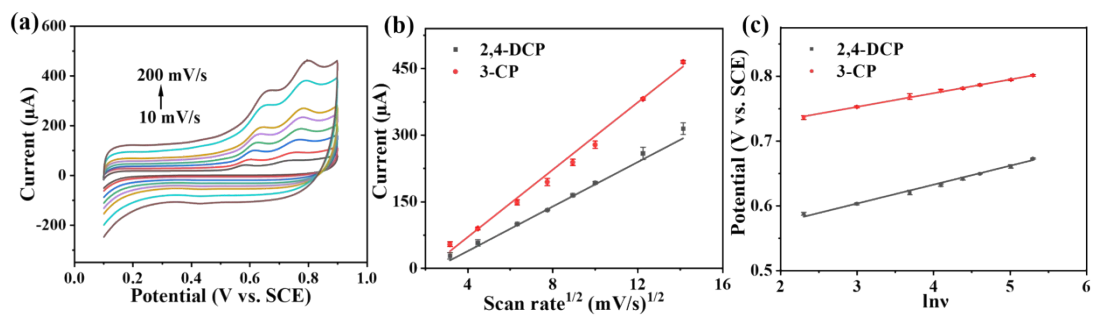

**Fig. S4.** (a) CVs of 2,4-DCP and 3-CP on CeNiCu-LDH@CC with different scan rate (10~200 mV/s); (b) Plots of oxidation peak currents versus  $v^{1/2}$ ; (c) Oxidation peak potential versus  $\ln v$

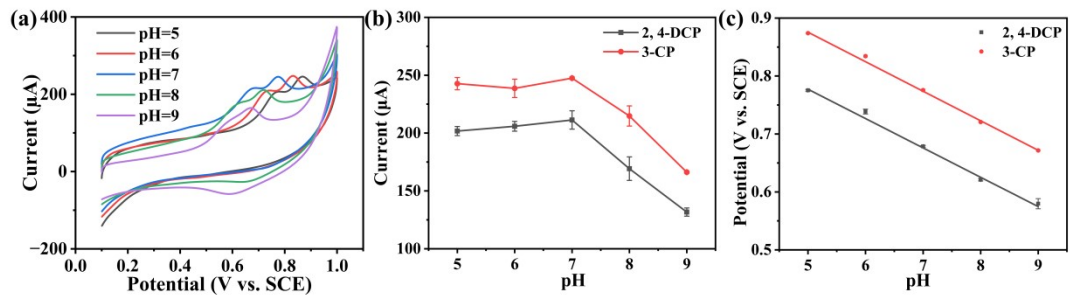

**Fig. S5.** (a) CVs of 10  $\mu\text{M}$  2,4-DCP and 10  $\mu\text{M}$  3-CP on CeNiCu-LDH@CC with different pH; Diagram of pH and oxidation peak (b) current (c) potential
